# Supplementary material for: Huaier Augmented the Chemotherapeutic Sensitivity of Oxaliplatin via Downregulation of YAP in Hepatocellular Carcinoma
Source: PubMed Central journal article supplement — J Cancer. 2018 Oct 10;9(21):3962–70. doi: 10.7150/jca.25909 (PMC6218774; doi:10.7150/jca.25909), 2018-10-10
Supplement: jcav09p3962s1.pdf [file jcav09p3962s1.pdf]

**Fig. S1.** (A) Cells were incubated in culture medium containing 10 $\mu$ g/ml Oxa, which was dissolved in DMSO or 5% glucose (5% GS). DMSO and 5% GS were negative controls. Cell viability was measured by CCK8 assay. (B) Bel-7404 and SMMC-7721 cells were incubated with Oxa (10  $\mu$ g/ml) for 24h. WB assay analyzed the protein expression level of  $\beta$ -catenin and CTGF. (C) Cell viability was measured by CCK8 assay and 50% inhibitive concentration (IC50) of HE was calculated also. (D) Bel-7404 cells were incubated with Oxa (10  $\mu$ g/ml), HE (12mg/ml), or Oxa (10  $\mu$ g/ml) combined with HE (12mg/ml) for 24h. WB assay analyzed the protein expression levels of  $\beta$ -catenin and  $\beta$ -TrCP. Representative results of three experiments were shown.

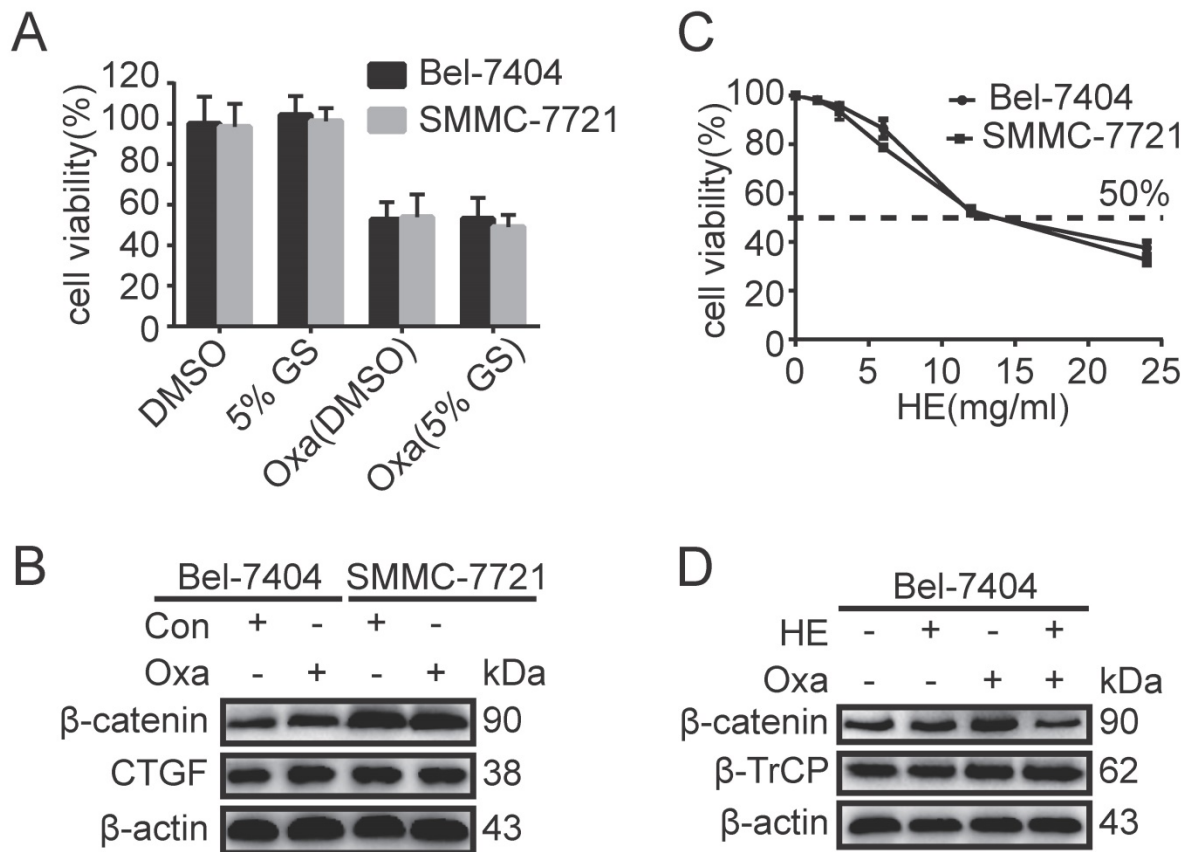

Supplementary Table 1: Primers for qRT-PCR

| Gene               | Sequence (5'→3')          |
|--------------------|---------------------------|
| GAPDH-F            | GGGTGTGAACCATGAGAAGTATG   |
| GAPDH-R            | AGTAGAGGCAGGGATGATGTTCT   |
| CTGF-F             | TGCCCTCGCGGCTTACCGAC      |
| CTGF-R             | TGCAGGAGGCGTTGTCATTG      |
| Cyr61-F            | GATCTGCAGAGCTCAGTCAG      |
| Cyr61-R            | GCACTGCCCGGTAAC TTTGA     |
| YAP-F              | ATTCTCCAAAATGTCAGGAGTTAG  |
| YAP-R              | CTTCTATGTTTCATTCCATCTCCTT |
| $\beta$ -Catenin-F | CATCTACACAGTTTGATGCTGCT   |
| $\beta$ -Catenin-R | GCAGTTTTTGTCAGTTCAGGGA    |
| ANKRD1-F           | CGAGATAAGTTGCTCAGCAC      |
| ANKRD1-R           | G TTCAGTCTCACCGCATCAT     |
